# Supplementary material for: The colonic epithelium plays an active role in promoting colitis by shaping the tissue cytokine profile
Source: PLOS journal article supplement (doi:10.1371/journal.pbio.2002417), 2018-03-29
Supplement: S9 (10.1371/journal.pbio.2002417.s009) [file journal.pbio.2002417.s009]

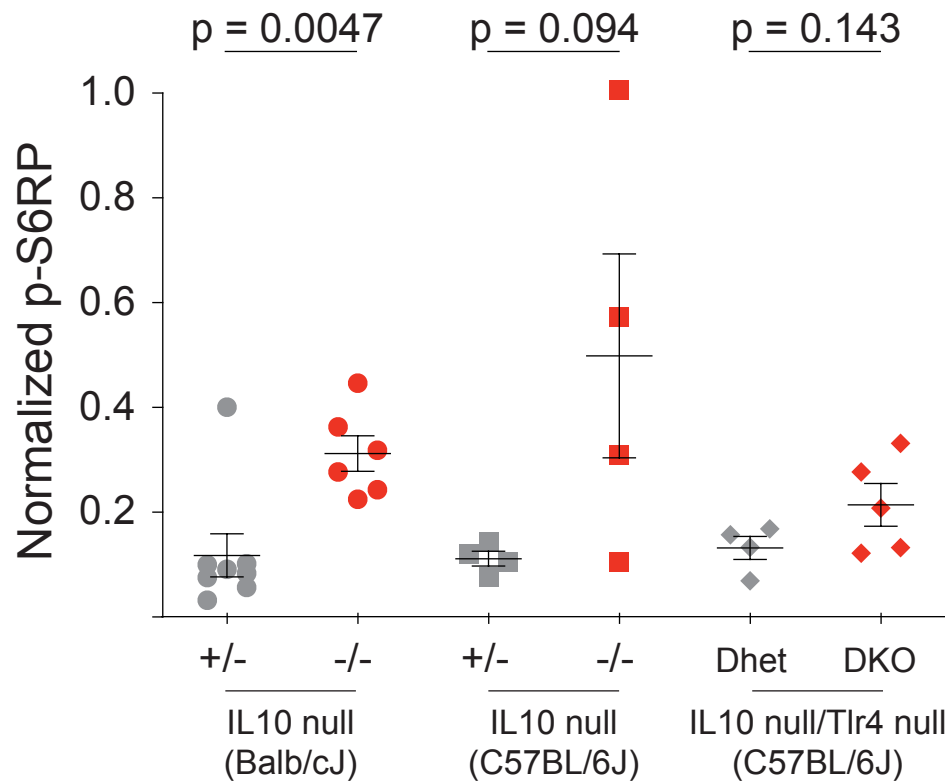

**S8 Fig. Induction of mammalian target of rapamycin (mTOR) pathway activity, as measured by p-S6 ribosomal protein (p-S6RP), in multiple mouse models of inflammatory bowel disease (IBD).** The genotype of each group is indicated below the measurements: +/- for heterozygous and -/- for null. Dhet, double heterozygous; DKO, double knockout. The genetic background of each model is indicated in parentheses. p-S6RP was measured via Luminex assay. Horizontal and vertical lines represent mean +/- standard error. Significance was determined by one-way ANOVA with Tukey-Kramer post-test.

Underlying numerical values are provided in S1 Data.
